# Supplementary material for: Aqueous synthesis of Na3-2xSb1-xWxS4-xIx solid-state electrolytes with ultrahigh ionic conductivity
Source: Research Square preprint supplement (doi:10.21203/rs.3.rs-7998984/v1), 2025-11-25
Supplement: Supplementary file 1 [file 265fae089a21c5a8b58a3090.pdf]

## Supplementary information

### **Aqueous synthesis of $\text{Na}_{3-2x}\text{Sb}_{1-x}\text{W}_x\text{S}_{4-x}\text{I}_x$ solid-state electrolytes with ultrahigh ionic conductivity**

Yuxin Shao<sup>1,2,3,#</sup>, Chengwei Gao<sup>1,2,3,#,\*</sup>, Chengmiao He<sup>1,2,3</sup>, Zipeng Liu<sup>1,2,3</sup>, Lanlan Xing<sup>1,2,3</sup>,  
Zhenyu Zhang<sup>1,2,3</sup>, Shiliang Kang<sup>1,2,3</sup>, Linling Tan<sup>1,2,3</sup>, Qing Jiao<sup>1,2,3</sup>, Ying Xie<sup>1,2,3</sup>, Yanfei  
Zhang<sup>4</sup>, Baoan Song<sup>1,2,3</sup>, Shixun Dai<sup>1,2,3</sup>, Yuanzheng Yue<sup>5,\*</sup>, Changgui Lin<sup>1,2,3,\*</sup>

<sup>1</sup>Laboratory of Infrared Materials and Devices, The Research Institute of Advanced Technologies, Ningbo University, Ningbo, 315211, China

<sup>2</sup>Key Laboratory of Photoelectric Detection Materials and Devices of Zhejiang Province, Ningbo University, Ningbo, 315211, China

<sup>3</sup>Engineering Research Center for Advanced Infrared Photoelectric Materials and Devices of Zhejiang Province, Ningbo University, Ningbo, 315211, China

<sup>4</sup> School of Materials Science and Engineering, Qilu University of Technology (Shandong Academy of Sciences), Jinan 250353, China

<sup>5</sup> Department of Chemistry and Bioscience, Aalborg University, DK-9220 Aalborg, Denmark

**E-mails:** C. W. Gao ([gaochengwei@nbu.edu.cn](mailto:gaochengwei@nbu.edu.cn)), Y. Z. Yue ([yy@bio.aau.dk](mailto:yy@bio.aau.dk)); C. G. Lin ([linchanggui@nbu.edu.cn](mailto:linchanggui@nbu.edu.cn))

**Supplementary Figure 1-3** are synthesis and structure of the  $\text{Na}_3\text{SbS}_4$ ,  $\text{Na}_3\text{SbS}_{4-x}\text{I}_x$  and  $\text{Na}_{3-2x}\text{Sb}_{1-x}\text{W}_x\text{S}_{4-x}\text{I}_x$  ( $x=0.05, 0.1, 0.15$ ) SSEs.

**Supplementary Table 1** is the crystallographic data for the prepared  $\text{Na}_{2.8}\text{Sb}_{0.9}\text{W}_{0.1}\text{S}_{3.9}\text{I}_{0.1}$ .

**Supplementary Table 2-3** are the EDS and ICP-MS data for the prepared  $\text{Na}_{2.8}\text{Sb}_{0.9}\text{W}_{0.1}\text{S}_{3.9}\text{I}_{0.1}$ .

**Supplementary Figure 4** is the apparent density of  $\text{Na}_{2.8}\text{Sb}_{0.9}\text{W}_{0.1}\text{S}_{3.9}\text{I}_{0.1}$  SSEs.

**Supplementary Figure 5-6** are conduction characteristics of the  $\text{Na}_3\text{SbS}_4$ ,  $\text{Na}_3\text{SbS}_{4-x}\text{I}_x$  and  $\text{Na}_{3-2x}\text{Sb}_{1-x}\text{W}_x\text{S}_{4-x}\text{I}_x$  ( $x=0.05, 0.1, 0.15$ ) SSEs.

**Supplementary Figure 7-8** are chemical stability characteristic of the  $\text{Na}_{3-2x}\text{Sb}_{1-x}\text{W}_x\text{S}_{4-x}\text{I}_x$  ( $x=0.05, 0.1, 0.15$ ),  $\text{Na}_3\text{SbS}_4$ ,  $\text{Na}_3\text{PS}_4$  and  $\text{Li}_6\text{PS}_5\text{Cl}$ .

**Supplementary Table 4** is the summary of chemical stability characteristic for the  $\text{Na}_{2.8}\text{Sb}_{0.9}\text{W}_{0.1}\text{S}_{3.9}\text{I}_{0.1}$ ,  $\text{Na}_3\text{SbS}_4$ ,  $\text{Na}_3\text{PS}_4$  and  $\text{Li}_6\text{PS}_5\text{Cl}$ .

**Supplementary Figure 9-11** are solid-state battery performance of  $\text{Na}_{3-2x}\text{Sb}_{1-x}\text{W}_x\text{S}_{4-x}\text{I}_x$  ( $x=0.05, 0.1, 0.15$ ) SSEs.

**Supplementary Figure 12** is the element mapping of Na, Sb, S, W, I, Ti of the aqueous synthesis anode.

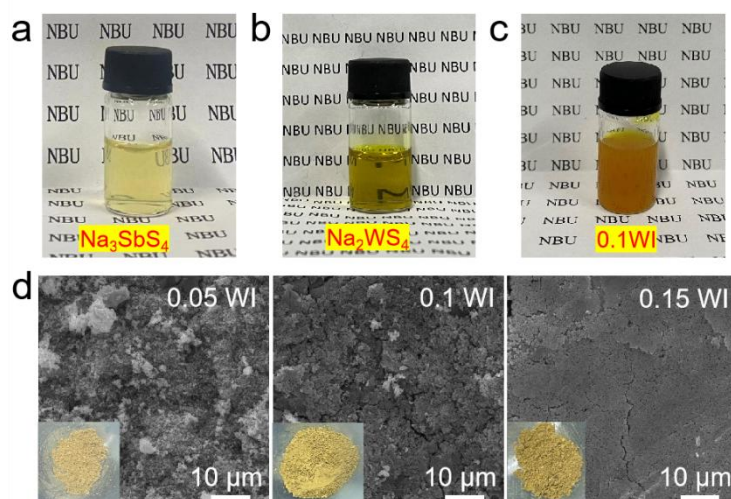

**Supplementary Figure 1.** Optical images of the precursor aqueous solutions of **a**  $\text{Na}_3\text{SbS}_4$ , **b**  $\text{Na}_2\text{WS}_4$  and **c** 0.1WI. **d** Backscattered electron (BSE) images of  $\text{Na}_{3-2x}\text{Sb}_{1-x}\text{W}_x\text{S}_{4-x}\text{I}_x$  SSEs ( $x=0.05, 0.1, 0.15$ ) with a scale bar of 10  $\mu\text{m}$ . The insert shows the heat-treated powders optical images.

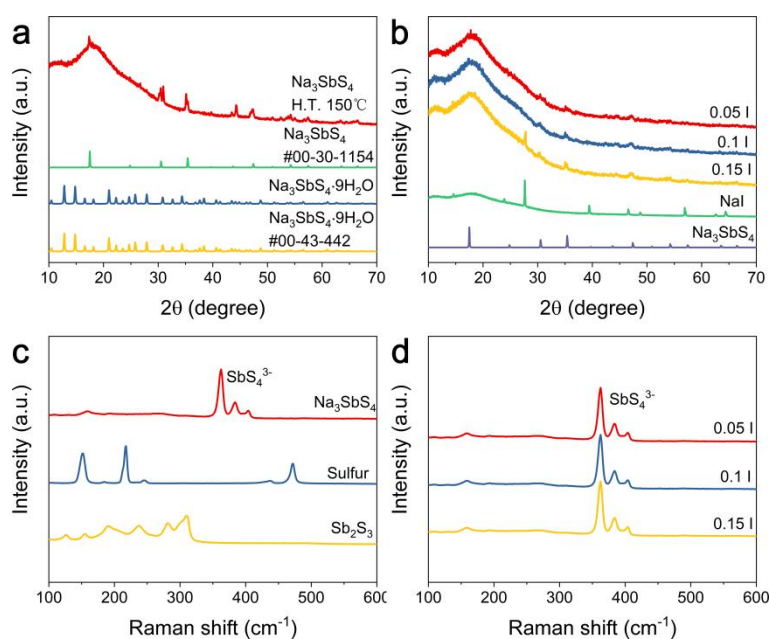

**Supplementary Figure 2.** **a-b** XRD patterns of  $\text{Na}_3\text{SbS}_4 \cdot 9\text{H}_2\text{O}$ ,  $\text{Na}_3\text{SbS}_4$  and  $\text{Na}_3\text{SbS}_{4-x}\text{I}_x$  ( $x=0.05, 0.1, 0.15$ ) prepared by the aqueous phase method. **c-d** Raman spectra of  $\text{Na}_3\text{SbS}_4$ , sulfur,  $\text{Sb}_2\text{S}_3$  and  $\text{Na}_{3-2x}\text{Sb}_{1-x}\text{W}_x\text{S}_{4-x}\text{I}_x$  ( $x=0.05, 0.1, 0.15$ ).

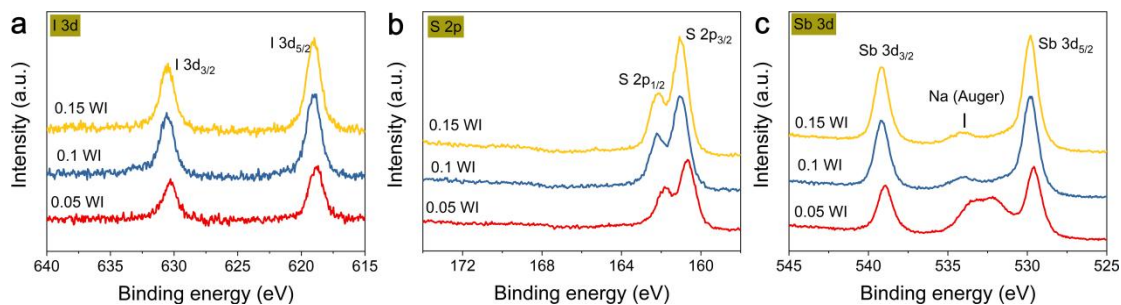

**Supplementary Figure 3.** XPS core levels of **a** I 3d, **b** S 2p and **c** Sb 3d of  $\text{Na}_{3-2x}\text{Sb}_{1-x}\text{W}_x\text{S}_{4-x}\text{I}_x$  SSEs ( $x=0.05, 0.1, 0.15$ ).

**Table S1.** Crystallographic data for the prepared  $\text{Na}_{2.8}\text{Sb}_{0.9}\text{W}_{0.1}\text{S}_{3.9}\text{I}_{0.1}$ .

|                 |                        |           |                   |             |             |                       |
|-----------------|------------------------|-----------|-------------------|-------------|-------------|-----------------------|
| Crystal System  | Cubic                  |           | Lattice Parameter |             |             | a = 7.199198 Å        |
| Space Group     | <i>I</i> -43m<br>(217) | (No.      | Volume, Z         |             |             | V = 373.123 Å³, Z = 2 |
| Atoms           |                        |           |                   |             |             |                       |
| x y z B<br>/ Å² | Wyckoff                | Occupancy | x                 | y           | z           | B/Å²                  |
| Na              | 6 <i>b</i>             | 0.933     | 0                 | 0           | 1/2         |                       |
| Sb              | 2 <i>a</i>             | 0.9       | 0                 | 0           | 0           |                       |
| W               | 2 <i>a</i>             | 0.1       | 0                 | 0           | 0           |                       |
| S               | 8 <i>c</i>             | 0.975     | 0.191947(1)       | 0.191947(1) | 0.191947(1) |                       |
| I               | 8 <i>c</i>             | 0.025     | 0.191947(1)       | 0.191947(1) | 0.191947(1) |                       |

\* $R_{wp} = 0.0238$ ,  $R_p = 0.0353$

**Table S2.** EDS (Energy Dispersive Spectrometer) data for the  $\text{Na}_{2.8}\text{Sb}_{0.9}\text{W}_{0.1}\text{S}_{3.9}\text{I}_{0.1}$  SSE.

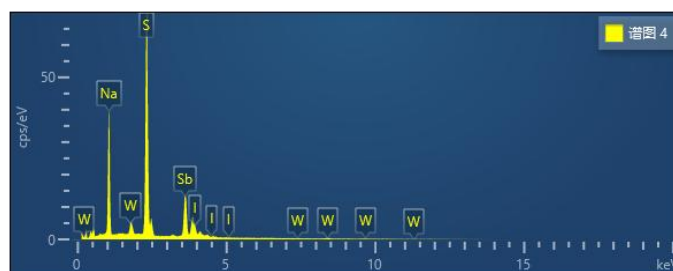

| Element | Series   | Weight wt. % | Atomic at. % | Error |
|---------|----------|--------------|--------------|-------|
| Na      | K-series | 19.96        | 37.20        | 0.18  |
| Sb      | L-series | 35.79        | 12.59        | 0.30  |
| W       | L-series | 5.13         | 1.20         | 0.22  |
| S       | L-series | 35.85        | 47.90        | 0.24  |

|   |          |      |      |      |
|---|----------|------|------|------|
| I | K-series | 3.27 | 1.10 | 0.03 |
|---|----------|------|------|------|

**Table S3.** ICP-MS (Inductively Coupled Plasma Mass Spectrometry) data for  $\text{Na}_{2.8}\text{Sb}_{0.9}\text{W}_{0.1}\text{S}_{3.9}\text{I}_{0.1}$  SSE.

| Weight $m_0$<br>(g) | Constant<br>volume $V_0$<br>(ml) | Element | Test<br>solution<br>element<br>concentration $C_0$<br>(ug/L) | Dilution<br>factor $f$ | Element<br>concentration $C_1$ in<br>the<br>original<br>digestion<br>solution<br>(ug/L) | Element<br>content $C_x$<br>(ug/kg) | Element<br>content<br>W (%) |
|---------------------|----------------------------------|---------|--------------------------------------------------------------|------------------------|-----------------------------------------------------------------------------------------|-------------------------------------|-----------------------------|
| 0.0559              | 25                               | I       | 184.7691                                                     | 500                    | 92384.5250                                                                              | 41316871.6458                       | 4.1317%                     |
| 0.0559              | 25                               | I       | 187.3601                                                     | 500                    | 93680.0400                                                                              | 41896261.1807                       | 4.1896%                     |
| 0.0559              | 25                               | I       | 185.8926                                                     | 500                    | 92946.2950                                                                              | 41568110.4651                       | 4.1568%                     |
| 0.0457              | 25                               | Na      | 35.4451                                                      | 10                     | 354.4505                                                                                | 193900.7265                         | 19.3901%                    |
| 0.0457              | 25                               | Na      | 35.4212                                                      | 10                     | 354.2124                                                                                | 193770.4590                         | 19.3770%                    |
| 0.0457              | 25                               | Na      | 35.5059                                                      | 10                     | 355.0586                                                                                | 194233.3549                         | 19.4233%                    |
| 0.0457              | 25                               | S       | 5.9626                                                       | 100                    | 596.2628                                                                                | 326183.1260                         | 32.6183%                    |
| 0.0457              | 25                               | S       | 6.0781                                                       | 100                    | 607.8101                                                                                | 332500.0728                         | 33.2500%                    |
| 0.0457              | 25                               | S       | 6.0054                                                       | 100                    | 600.5418                                                                                | 328523.9422                         | 32.8524%                    |
| 0.0457              | 25                               | Sb      | 6.0316                                                       | 100                    | 603.1640                                                                                | 329958.4333                         | 32.9958%                    |
| 0.0457              | 25                               | Sb      | 6.0747                                                       | 100                    | 607.4650                                                                                | 332311.2888                         | 33.2311%                    |

|            |    |    |        |     |          |                 |              |
|------------|----|----|--------|-----|----------|-----------------|--------------|
| 0.045<br>7 | 25 | Sb | 6.0782 | 100 | 607.8247 | 332508.024<br>6 | 33.2508<br>% |
| 0.045<br>7 | 25 | W  | 1.2379 | 100 | 123.7877 | 67717.5870      | 6.7718<br>%  |
| 0.045<br>7 | 25 | W  | 1.2560 | 100 | 125.6025 | 68710.3364      | 6.8710<br>%  |
| 0.045<br>7 | 25 | W  | 1.2531 | 100 | 125.3067 | 68548.5498      | 6.8549<br>%  |

$$C_x = C_0 * f * 10^{-3} / m_0 * 10^{-3} = C_1 * V_0 \quad (1)$$

$$w = C_x / 10^9 * 100\% \quad (2)$$

The corresponding standard series curves of I, Na, S, Sb and W, respectively are shown below.

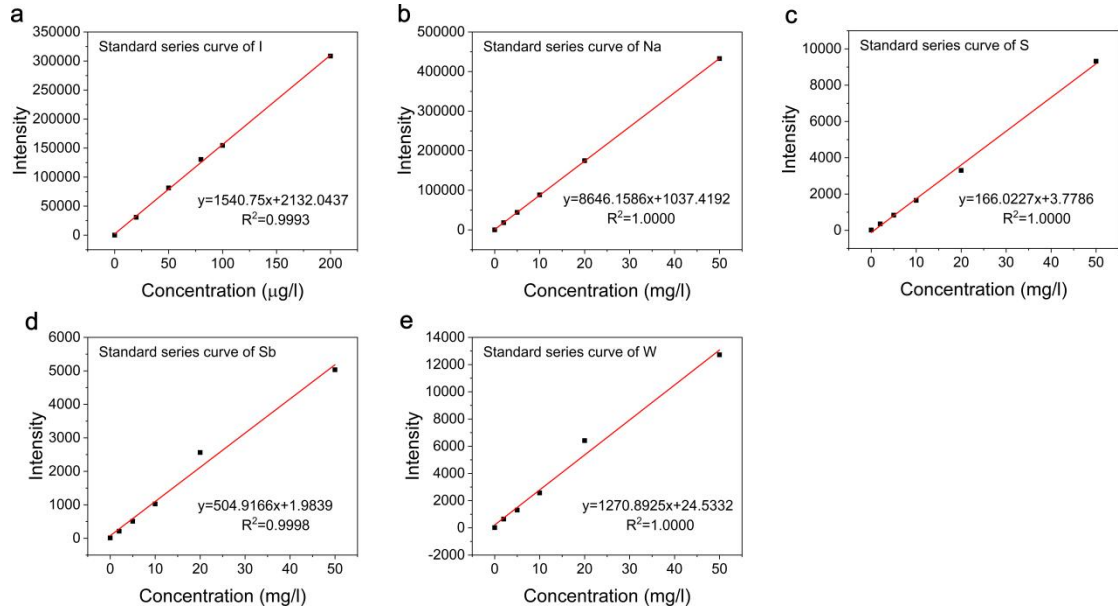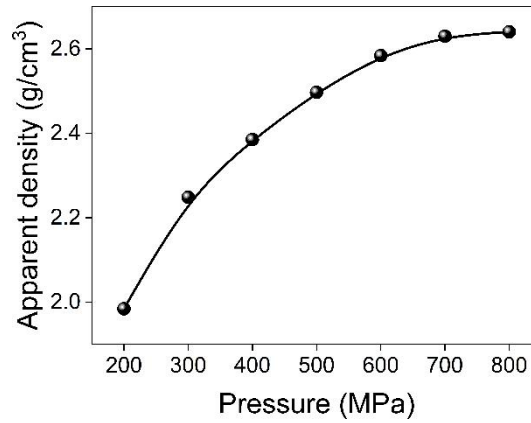

**Supplementary Figure 4.** Apparent density of Na<sub>2.8</sub>Sb<sub>0.9</sub>W<sub>0.1</sub>S<sub>3.9</sub>I<sub>0.1</sub> SSEs. The apparent density area at ~2.6 g cm<sup>-3</sup> when the pressure ≥ 700 MPa.

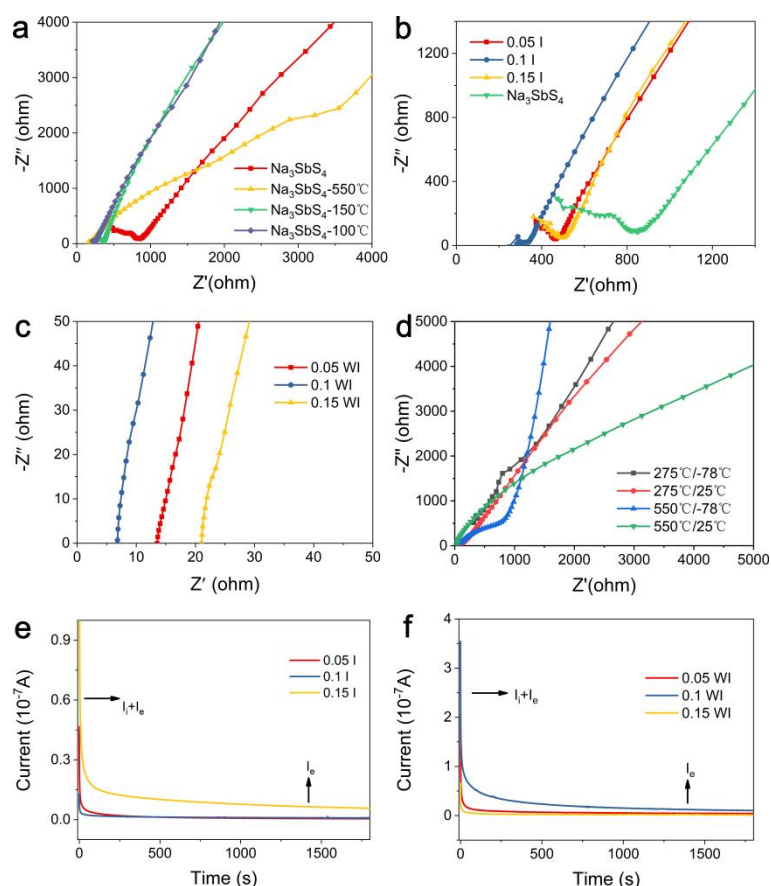

**Supplementary Figure 5.** **a** Nyquist plots of  $\text{Na}_3\text{SbS}_4$  were cold pressed at 720 MPa, annealed at 550 °C, 150°C and 100 °C, respectively. The yellow curve of  $\text{Na}_3\text{SbS}_4$  was prepared by solid phase method. **b-c** Nyquist plots of  $\text{Na}_3\text{SbS}_{4-x}\text{I}_x$  and  $\text{Na}_{3-2x}\text{Sb}_{1-x}\text{W}_x\text{S}_{4-x}\text{I}_x$  SSEs ( $x=0.05, 0.1, 0.15$ ), respectively. **d** Nyquist plots of  $\text{Na}_{2.8}\text{Sb}_{0.9}\text{W}_{0.1}\text{S}_{3.9}\text{I}_{0.1}$  at -78 °C and room temperature (25 °C) after heat treatment at 275 °C and 550 °C, respectively. **e-f** Direct current polarization curves of  $\text{Na}_{3-2x}\text{SbS}_{4-x}\text{I}_x$  and  $\text{Na}_{3-2x}\text{Sb}_{1-x}\text{W}_x\text{S}_{4-x}\text{I}_x$  SSEs ( $x=0.05, 0.1, 0.15$ ), respectively.

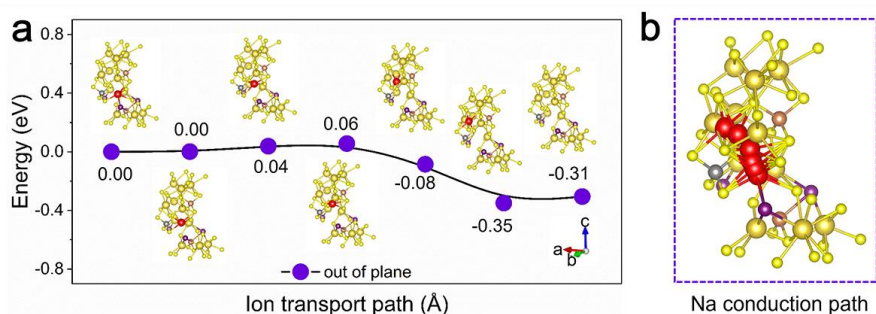

**Supplementary Figure 6.** **a** Activation energy barriers for sodium ion migration and **b** the theoretically obtained structure model for the ground state of the  $\text{Na}_{2.8}\text{Sb}_{0.9}\text{W}_{0.1}\text{S}_{3.9}\text{I}_{0.1}$  and with the marked sodium ion migration path corresponding.

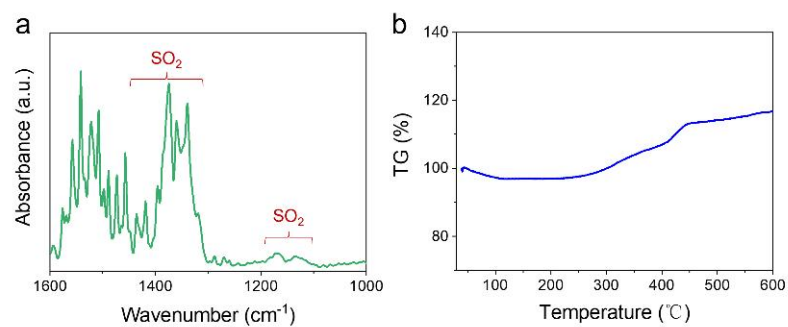

**Supplementary Figure 7.** **a** FTIR spectra of  $\text{Na}_{2.8}\text{Sb}_{0.9}\text{W}_{0.1}\text{S}_{3.9}\text{I}_{0.1}$  in the pure oxygen atmosphere, the formation of  $\text{SO}_2$  is evidenced by the bands at 1450-1300 and 1150  $\text{cm}^{-1}$ . **b** The corresponding TG of TG-IR at a heating rate of 10  $^{\circ}\text{C}/\text{min}$ .

**Table S4.** Summary of the enthalpies, Gibbs Energies and bond energy of Formation for Sb-O, Sb-S, W-O, W-S, P-O and P-S at 298.15 K, respectively.

| Bond                             | $\Delta_f H^{\circ}$ (kJ/mol) | $\Delta_f G^{\circ}$ (kJ/mol) | Bond Energy(kJ/mol) |
|----------------------------------|-------------------------------|-------------------------------|---------------------|
| Sb-O ( $\text{Sb}_2\text{O}_3$ ) | -708.8                        | -831.0                        | 372.0 (84)          |
| Sb-S ( $\text{Sb}_2\text{S}_3$ ) | -174.9                        | -174.9                        | 379.0               |
| W-O ( $\text{WO}_3$ )            | -842.9                        | -764.1                        | 635.0 (25)          |
| W-S ( $\text{WS}_2$ )            | -243.1                        | -23.0                         | 440.0               |
| P-O ( $\text{P}_2\text{O}_5$ )   | -2984.0                       | -2697.7                       | 596.0               |
| P-O ( $\text{P}_2\text{S}_5$ )   | -1770.0                       | -1506                         | 346.0 (17)          |

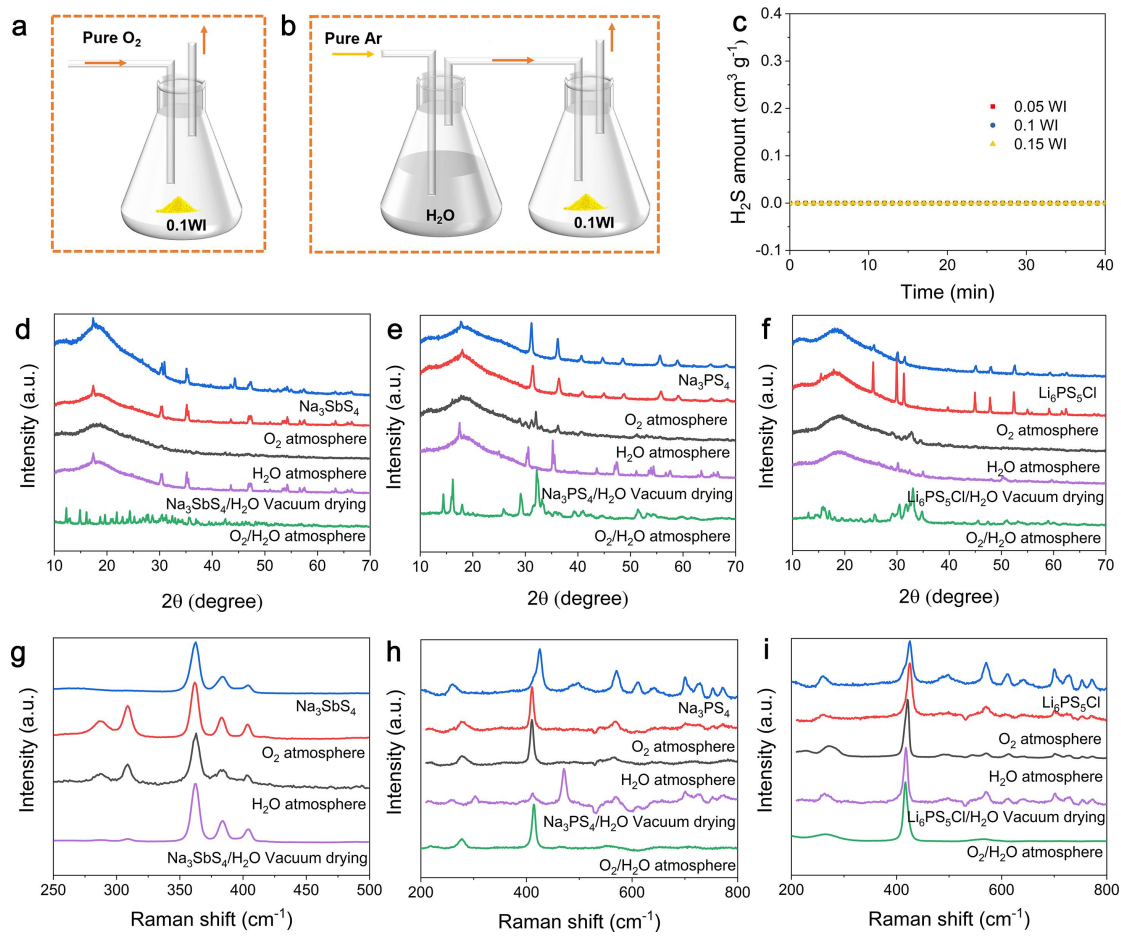

**Supplementary Figure 8.** **a-b** Schematic diagram of controlled humidity exposure experiments with continuous O<sub>2</sub> and H<sub>2</sub>O purging for 12 h. **c** The amount of H<sub>2</sub>S released by Na<sub>3-2x</sub>Sb<sub>1-x</sub>W<sub>x</sub>S<sub>4-x</sub>I<sub>x</sub> SSEs (x=0.05, 0.1, 0.15) exposed to moist air for 40 min. **d-f** XRD and **g-i** Raman spectroscopy before and after exposure experiments in specific atmosphere of Na<sub>3</sub>SbS<sub>4</sub>, Na<sub>3</sub>PS<sub>4</sub> and Li<sub>6</sub>PS<sub>5</sub>Cl, respectively.

**Table S5.** Summary of O<sub>2</sub>, H<sub>2</sub>O and the mixture of O<sub>2</sub>/H<sub>2</sub>O stability of several typical chalcogenide electrolytes.

| Atmosphere                       | 0.1 WI | Na <sub>3</sub> SbS <sub>4</sub> | Na <sub>3</sub> PS <sub>4</sub> | Li <sub>6</sub> PS <sub>5</sub> Cl |
|----------------------------------|--------|----------------------------------|---------------------------------|------------------------------------|
| O <sub>2</sub>                   | X      | X                                | √                               | √                                  |
| H <sub>2</sub> O                 | √      | √                                | X                               | √                                  |
| O <sub>2</sub> /H <sub>2</sub> O | X      | X                                | X                               | X                                  |

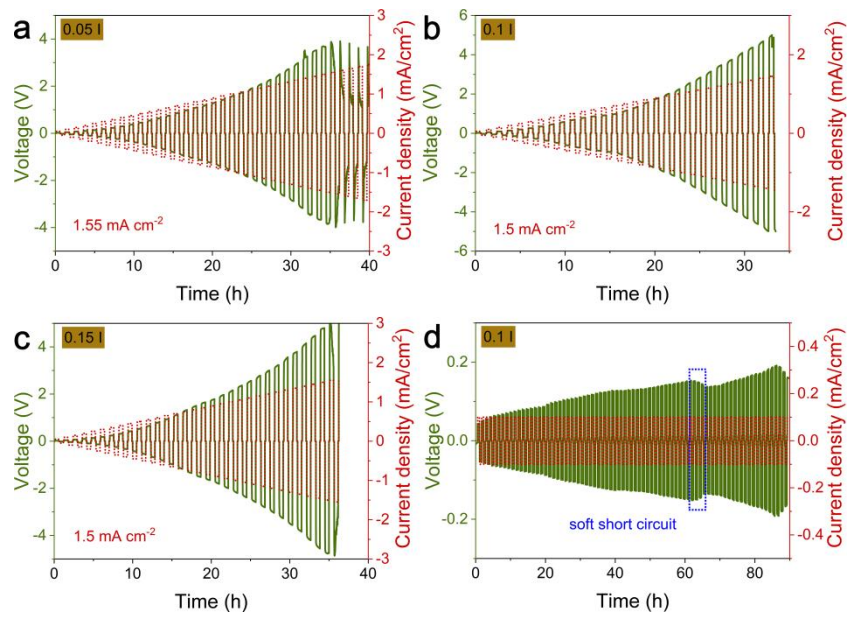

**Supplementary Figure 9.** **a-c** Critical current density tests of the Na|SSEs|Na symmetric cells at step-increased current densities at room temperature where SSEs are  $\text{Na}_3\text{SbS}_{4-x}\text{I}_x$  ( $x=0.05, 0.1, 0.15$ ), respectively. The time for each charge and discharge step is 0.5 h. The step size for the current increase is  $0.05 \text{ mA cm}^{-2}$ . **d** Galvanostatic sodium stripping/plating cycling of the Na| $\text{Na}_{2.8}\text{SbS}_{3.9}\text{I}_{0.1}$ |Na symmetric cells at  $0.1 \text{ mA cm}^{-2}$  at room temperature. The time for each stripping and plating segment is 0.5 h.

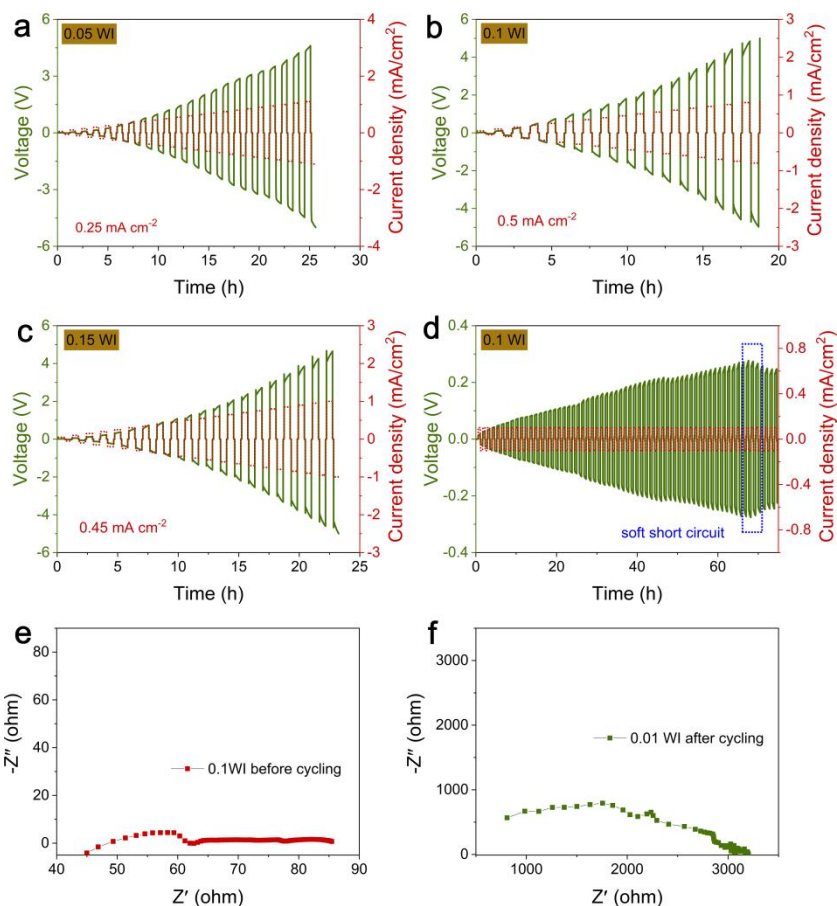

**Supplementary Figure 10.** **a-c** Critical current density tests of the Na|SSEs|Na symmetric cells at step-increased current densities at room temperature where SSEs are  $\text{Na}_{3-2x}\text{Sb}_{1-x}\text{W}_x\text{S}_{4-x}\text{I}_x$  ( $x=0.05, 0.1, 0.15$ ), respectively. **d** Galvanostatic sodium stripping/plating cycling of the Na| $\text{Na}_{2.8}\text{Sb}_{0.9}\text{W}_{0.1}\text{S}_{3.9}\text{I}_{0.1}$ |Na symmetric cells at  $0.1 \text{ mA cm}^{-2}$ . **e-f** Nyquist plots of Na| $\text{Na}_{2.8}\text{Sb}_{0.9}\text{W}_{0.1}\text{S}_{3.9}\text{I}_{0.1}$ |Na before and after cycling.

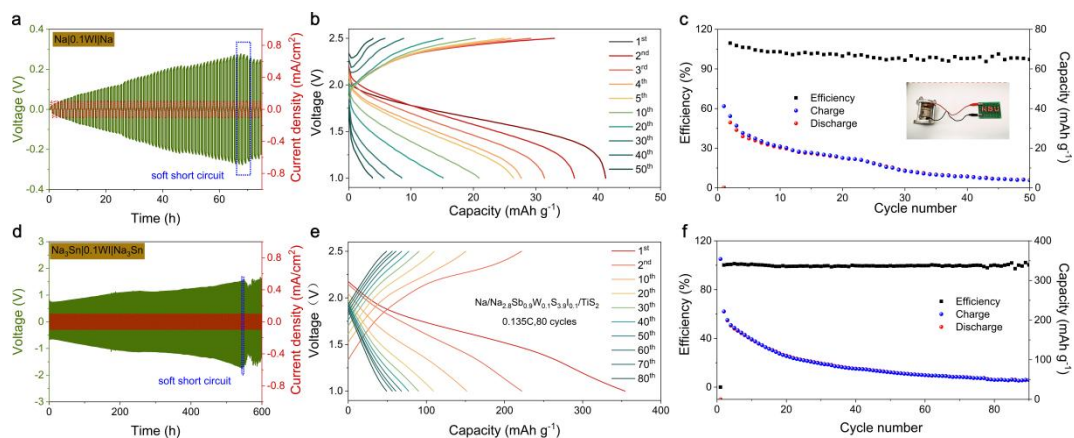

**Supplementary Figure 11.** **a** and **d** Galvanostatic sodium stripping/plating cycling of the Na| $\text{Na}_{2.8}\text{Sb}_{0.9}\text{W}_{0.1}\text{S}_{3.9}\text{I}_{0.1}$ |Na and  $\text{Na}_3\text{Sn}$ | $\text{Na}_{2.8}\text{Sb}_{0.9}\text{W}_{0.1}\text{S}_{3.9}\text{I}_{0.1}$ | $\text{Na}_3\text{Sn}$  symmetric cells at  $0.1 \text{ mA cm}^{-2}$ . **b** Galvanostatic voltage profile and **c** galvanostatic cycling

performance of the  $\text{Na}[\text{Na}_{2.8}\text{Sb}_{0.9}\text{W}_{0.1}\text{S}_{3.9}\text{I}_{0.1}]\text{TiS}_2$  full cell. The insert is a light bulb demonstration after the battery is assembled. **e** Galvanostatic voltage profile and **f** galvanostatic cycling performance of the  $\text{Na}_3\text{Sn}[\text{Na}_{2.8}\text{Sb}_{0.9}\text{W}_{0.1}\text{S}_{3.9}\text{I}_{0.1}]\text{TiS}_2$  full cell.

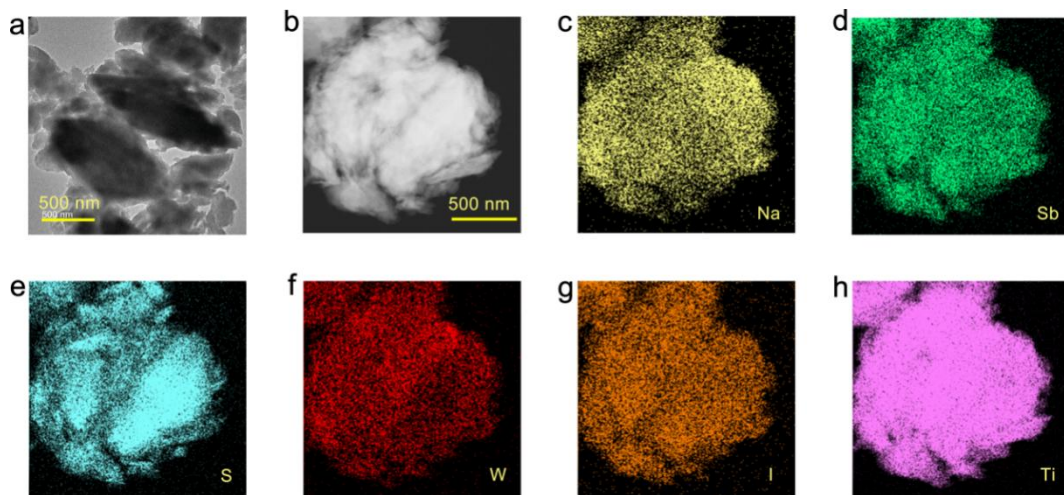

**Supplementary Figure 12.** Element mapping of Na, Sb, S, W, I, Ti of the aqueous synthesis anode.
